# Supplementary material for: Prognostic Immune-Related Genes of Patients With Ewing’s Sarcoma
Source: Front Genet. 2021 May 28;12:669549. doi: 10.3389/fgene.2021.669549 (PMC8194304; doi:10.3389/fgene.2021.669549)
Supplement: Supplementary file 1 [file Table_1.XLSX]

## Sheet: Sheet1
id	group1	group2	p	p.adj	p.format	method
ESTIMATEScore	Immunity_M	Immunity_L	3.15e-13	9.4e-13	3.1e-13	Wilcoxon
ESTIMATEScore	Immunity_M	Immunity_H	9.44e-09	1.9e-08	9.4e-09	Wilcoxon
ESTIMATEScore	Immunity_L	Immunity_H	1.03e-06	1e-06	1e-06	Wilcoxon
ImmuneScore	Immunity_M	Immunity_L	1.38e-15	4.1e-15	1.4e-15	Wilcoxon
ImmuneScore	Immunity_M	Immunity_H	2.83e-07	5.7e-07	2.8e-07	Wilcoxon
ImmuneScore	Immunity_L	Immunity_H	1.03e-06	1e-06	1e-06	Wilcoxon
StromalScore	Immunity_M	Immunity_L	4.11e-06	4.1e-06	4.1e-06	Wilcoxon
StromalScore	Immunity_M	Immunity_H	4.25e-07	1.3e-06	4.2e-07	Wilcoxon
StromalScore	Immunity_L	Immunity_H	1.03e-06	2.1e-06	1e-06	Wilcoxon
TumorPurity	Immunity_M	Immunity_L	3.15e-13	9.4e-13	3.1e-13	Wilcoxon
TumorPurity	Immunity_M	Immunity_H	9.44e-09	1.9e-08	9.4e-09	Wilcoxon
TumorPurity	Immunity_L	Immunity_H	1.03e-06	1e-06	1e-06	Wilcoxon
CD274	Immunity_M	Immunity_L	0.0315284	0.032	0.03153	Wilcoxon
CD274	Immunity_M	Immunity_H	0.00350691	0.007	0.00351	Wilcoxon
CD274	Immunity_L	Immunity_H	0.00013792	0.00041	0.00014	Wilcoxon
